# Supplementary material for: Screening of Bacteria Inhibiting Clostridium perfringens and Assessment of Their Beneficial Effects In Vitro and In Vivo with Whole Genome Sequencing Analysis
Source: MDPI journal article supplement (doi:10.3390/microorganisms10102056), 2022-10-18
Supplement: s1 [file s1]

**TABLE S1.** Gene with up to 50% similarity found in probiotics candidate genome according to the database of virulence factors

| Strains   | Gene ID  | Level1                           | Level2             | Description                                                  | Similarity |
|-----------|----------|----------------------------------|--------------------|--------------------------------------------------------------|------------|
| PP31      | gene0744 | Defensive<br>virulence factors   | Antiphagocytosis   | GAS capsular hyaluronate                                     | 70.3%      |
|           | gene0283 |                                  | Antiphagocytosis   | Prevent phagocytosis                                         | 50.5%      |
|           | gene0733 |                                  | Stress protein     | Serine protease involved in proteolysis                      | 71.1%      |
|           | gene1123 |                                  | Stress protein     | Repairs oxidized proteins                                    | 63.5%      |
|           | gene1265 |                                  | Antiphagocytosis   | Assisting in evading the host immune system                  | 67.9%      |
|           | gene1584 |                                  | Antiphagocytosis   | Resistant to complement deposition                           | 58.9%      |
|           | gene1594 |                                  | Stress protein     | ATPase                                                       | 59.8%      |
|           | gene1619 |                                  | Antiphagocytosis   | Contributes to host immune evasion                           | 62.7%      |
|           | gene0766 |                                  | Adherence          | Mediate a complement-independent attachment to host cells    | 56.4%      |
|           | gene1014 |                                  | Adherence          | Surface-expressed elongation factor-Tu                       | 69.2%      |
|           | gene1322 | Offensive<br>virulence factors   | Antiphagocytosis   | Contributes to host immune evasion                           | 58.2%      |
|           | gene1324 |                                  | Stress protein     | Detoxifies H2O2; Protects against ROS                        | 55.9%      |
|           | gene1344 |                                  | Antiphagocytosis   | Prevent phagocytosis                                         | 51.3%      |
|           | gene1345 |                                  | Stress protein     | Serine protease involved in proteolysis                      | 77.9%      |
|           | gene1424 |                                  | Antiphagocytosis   | Resistant to complement deposition                           | 62.4%      |
|           | gene1425 |                                  | Antiphagocytosis   | Contributes to host immune evasion                           | 55.7%      |
|           | gene1496 |                                  | Antiphagocytosis   | Assisting in evading the host immune system                  | 70.9%      |
|           | gene1640 |                                  | Stress protein     | A cytoplasmic iron superoxide dismutase                      | 52.1%      |
|           | gene1862 |                                  | Antiphagocytosis   | Prevent phagocytosis                                         | 51.2%      |
|           | gene1978 |                                  | Stress protein     | Repairs oxidized proteins                                    | 56.6%      |
| BA11      | gene2619 | Non-specific<br>virulence factor | Stress protein     | ATPase                                                       | 78.4%      |
|           | gene0013 |                                  | Invasion           | YplA, a phospholipase                                        | 51.7%      |
|           | gene0198 |                                  | Invasion           | Polar flagella required for motility and macrophage invasion | 51.3%      |
|           | gene0215 |                                  | Invasion           | Penetrating the mucus barrier                                | 52.1%      |
|           | gene0216 |                                  | Secretion system   | Translocating different effectors into the host cell,        | 52.9%      |
|           | gene0219 |                                  | Adherence          | Glycosylation of the flagellin                               | 50.4%      |
|           | gene0227 |                                  | Adherence          | A fibronectin-binding protein                                | 52.2%      |
|           | gene0259 |                                  | Toxin              | lysing erythrocytes, polymorphonuclear leukocytes            | 50%        |
|           | gene0260 |                                  | Secretion system   | ESX-1                                                        | 50.6%      |
|           | gene0286 |                                  | Adherence          | Surface-expressed elongation factor-Tu                       | 75%        |
|           | gene0305 | Defensive<br>virulence factors   | Adherence          | Mediate a complement-independent attachment to host cells    | 60.1%      |
|           | gene0480 |                                  | Iron uptake system | Iron uptake                                                  | 53.8%      |
|           | gene0816 |                                  | Iron uptake system | High-affinity catechol-hydroxamate siderophore               | 51.0%      |
|           | gene0957 |                                  | Iron uptake system | Catalyzes the formation of tissue-damaging free radicals     | 54.9%      |
|           | gene1048 |                                  | Iron uptake system | Acquiring iron from transferrin and lactoferrin.Cytotoxic    | 53.8%      |
|           | gene0490 |                                  | Antiphagocytosis   | GAS capsular hyaluronate                                     | 58.1%      |
|           | gene0365 |                                  | Antiphagocytosis   | Prevent phagocytosis                                         | 51.5%      |
|           | gene0384 |                                  | Stress protein     | Serine protease involved in proteolysis                      | 77.9%      |
|           | gene0489 |                                  | Antiphagocytosis   | Resistant to complement deposition                           | 62.1%      |
|           | gene1303 |                                  | Antiphagocytosis   | Contributes to host immune evasion;                          | 59.1%      |
| BA40<br>% | gene2008 | Defensive                        | Antiphagocytosis   | Prevent phagocytosis                                         | 50.4%      |
|           | gene2024 | virulence factors                | Stress protein     | Repairs oxidized proteins                                    | 56.6%      |

|     |          |                   |                    |                                                                |       |
|-----|----------|-------------------|--------------------|----------------------------------------------------------------|-------|
| BV5 | gene2262 |                   | Stress protein     | Detoxifies H2O2; Protects against ROS                          | 55.9% |
|     | gene2877 |                   | Stress protein     | A cytoplasmic iron superoxide dismutase                        | 52.1% |
|     | gene2994 |                   | Antiphagocytosis   | Assisting in evading the host immune system                    | 70.9% |
|     | gene3571 |                   | Stress protein     | ATPase                                                         | 78.4% |
|     | gene1282 |                   | Invasion           | YplA, a phospholipase                                          | 51.7% |
|     | gene1215 |                   | Adherence          | A fibronectin-binding protein                                  | 52.2% |
|     | gene1241 |                   | Adherence          | glycosylation of the flagellin                                 | 50.4% |
|     | gene1274 | Offensive         | Secretion system   | Translocating different effectors into the host cell           | 52.9% |
|     | gene1285 | virulence factors | Invasion           | Penetrating the mucus barrier                                  | 52.5% |
|     | gene1286 |                   | Invasion           | Polar flagella required for motility and macrophage invasion   | 51.3% |
|     | gene3551 |                   | Adherence          | Mediate a complement-independent attachment to host cells      | 60.2% |
|     | gene3597 |                   | Adherence          | Surface-expressed elongation factor-Tu mediates attachment     | 74.7% |
|     | gene0100 |                   | Iron uptake system | catalyzes the formation of tissue-damaging free radicals       | 55.1% |
|     | gene0204 | Non-              | Iron uptake system | Iron uptake                                                    | 53.4% |
|     | gene2767 | specific          | Iron uptake system | High-affinity catechol-hydroxamate siderophore                 | 50.6% |
|     | gene3790 | virulence factor  | Iron uptake system | Acquiring iron from transferrin and lactoferrin.Cytotoxic      | 66.7% |
|     | gene3888 |                   | Iron uptake system | May be necessary for penetration to deeper tissues             | 54.9% |
|     | gene1647 |                   | Antiphagocytosis   | GAS capsular hyaluronate                                       | 56.7% |
|     | gene0015 |                   | Stress protein     | Detoxifies H2O2; Protects against ROS                          | 55.9% |
|     | gene0763 |                   | Antiphagocytosis   | Contributes to host immune evasion;                            | 58.2% |
|     | gene0844 |                   | Antiphagocytosis   | Assisting in evading the host immune system                    | 70.9% |
|     | gene0961 | Defensive         | Stress protein     | A cytoplasmic iron superoxide dismutase                        | 52.1% |
|     | gene1646 | virulence factors | Antiphagocytosis   | Resistant to complement deposition                             | 65%   |
|     | gene1648 |                   | Antiphagocytosis   | Contributes to host immune evasion;                            | 55.3% |
|     | gene2391 |                   | Stress protein     | Repairs oxidized proteins                                      | 56.6% |
|     | gene2754 |                   | Antiphagocytosis   | Prevent phagocytosis                                           | 51.5% |
|     | gene2777 |                   | Stress protein     | Serine protease involved in proteolysis                        | 77.9% |
|     | gene3575 |                   | Stress protein     | ATPase                                                         | 78.4% |
|     | gene0742 |                   | Invasion           | YplA, a phospholipase                                          | 51.7% |
|     | gene0675 |                   | Adherence          | A fibronectin-binding protein present on the listerial surface | 52.2% |
|     | gene0701 |                   | Adherence          | glycosylation of the flagellin                                 | 50.4% |
|     | gene0734 | Offensive         | Secretion system   | Translocating different effectors into the host cell           | 52.1% |
|     | gene0745 | virulence factors | Invasion           | Penetrating the mucus barrier                                  | 52.1% |
|     | gene0746 |                   | Invasion           | Polar flagella required for motility and macrophage invasion   | 51.3% |
|     | gene1819 |                   | Toxin              | Lysing erythrocytes, polymorphonuclear leukocytes              | 50%   |
|     | gene2938 |                   | Adherence          | Mediate a complement-independent attachment to host cells      | 60.2% |
|     | gene3549 |                   | Adherence          | Surface-expressed elongation factor-Tu mediates attachment     | 75%   |
|     | gene1519 | Non-              | Iron uptake system | High-affinity catechol-hydroxamate siderophore                 | 51%   |
|     | gene2593 | Specific          | Iron uptake system | Iron uptake                                                    | 53.8% |
|     | gene3287 | virulence factor  | Iron uptake system | catalyzes the formation of tissue-damaging free radicals       | 54.8% |
