# Supplementary material for: Screening of Bacteria Inhibiting Clostridium perfringens and Assessment of Their Beneficial Effects In Vitro and In Vivo with Whole Genome Sequencing Analysis
Source: MDPI journal article supplement (doi:10.3390/microorganisms10102056), 2022-10-18
Supplement: s1 [file s1]

**TABLE S2** Gene with up to 50% similarity found in probiotics candidates genome according to the Comprehensive Antibiotic Resistance Database (CARD)

| Strains | Gene ID  | *ARO name | Drug class                                                              | Similarity |
|---------|----------|-----------|-------------------------------------------------------------------------|------------|
| PP31    | gene0264 | msbA      | nitroimidazole antibiotic                                               | 57.4%      |
|         | gene0578 | rpoB2     | peptide antibiotic; rifamycin antibiotic                                | 59.7%      |
|         | gene1266 | arlR      | acridine dye; fluoroquinolone antibiotic                                | 54.7%      |
|         | gene1710 | ErmB      | lincosamide antibiotic; macrolide antibiotic; streptogramin antibiotic  | 98.8%      |
|         | gene1714 | ErmA      | lincosamide antibiotic; macrolide antibiotic; streptogramin antibiotic  | 90.6%      |
|         | gene1728 | fexA      | phenicol antibiotic                                                     | 58.4%      |
|         | gene1886 | lnuA      | lincosamide antibiotic                                                  | 97.5%      |
|         | gene1888 | poxA      | lincosamide antibiotic; macrolide antibiotic; oxazolidinone antibiotic  | 99.6%      |
|         | gene0099 | rphB      | rifamycin antibiotic                                                    | 78.9%      |
|         | gene0536 | ykkD      | aminoglycoside antibiotic; phenicol antibiotic; tetracycline antibiotic | 81.7%      |
|         | gene0537 | ykkC      | aminoglycoside antibiotic; phenicol antibiotic; tetracycline antibiotic | 79.5%      |
|         | gene0547 | tetA      | penam; tetracycline antibiotic                                          | 52.5%      |
|         | gene0658 | Bla1      | penam                                                                   | 64.4%      |
|         | gene0744 | FosB      | fosfomycin                                                              | 62%        |
|         | gene0786 | blt       | acridine dye; fluoroquinolone antibiotic                                | 77.8%      |
| BA11    | gene2055 | tet(L)    | tetracycline antibiotic                                                 | 79.9%      |
|         | gene2056 | SAT-4     | nucleoside antibiotic                                                   | 52.2%      |
|         | gene2460 | vmrR      | lincosamide antibiotic; macrolide antibiotic; oxazolidinone antibiotic  | 71%        |
|         | gene2480 | clbA      | lincosamide antibiotic; phenicol antibiotic; pleuromutilin antibiotic   | 97.4%      |
|         | gene2870 | dfrG      | diaminopyrimidine antibiotic                                            | 51.9%      |
|         | gene3106 | tmrB      | nucleoside antibiotic                                                   | 76.6%      |
|         | gene3146 | lmrB      | lincosamide antibiotic                                                  | 88.4%      |
|         | gene3160 | mphK      | macrolide antibiotic                                                    | 65.8%      |
|         | gene3269 | aadK      | aminoglycoside antibiotic                                               | 63.4%      |
|         | gene3464 | mprF      | peptide antibiotic                                                      | 78.9%      |
|         | gene3567 | rpoB2     | peptide antibiotic; rifamycin antibiotic                                | 64.3%      |
|         | gene3693 | ampC1     | cephalosporin; penam                                                    | 52.5%      |
|         | gene1409 | rphB      | rifamycin antibiotic                                                    | 79.3%      |
|         | gene1885 | SAT-4     | nucleoside antibiotic                                                   | 52.2%      |
|         | gene1886 | tet(L)    | tetracycline antibiotic                                                 | 80.7%      |
| BA40    | gene2035 | dfrG      | diaminopyrimidine antibiotic                                            | 52.5%      |
|         | gene2428 | blt       | acridine dye; fluoroquinolone antibiotic                                | 77.8%      |
|         | gene2472 | FosB      | fosfomycin                                                              | 62%        |
|         | gene2543 | BclI      | cephalosporin; penam                                                    | 53.1%      |
|         | gene2592 | vmrR      | lincosamide antibiotic; macrolide antibiotic; oxazolidinone antibiotic  | 71.2%      |
|         | gene2614 | clbA      | lincosamide antibiotic; phenicol antibiotic; pleuromutilin antibiotic   | 99.4%      |
|         | gene3021 | ampC1     | cephalosporin; penam                                                    | 53.3%      |
|         | gene3106 | lmrB      | lincosamide antibiotic                                                  | 88.6%      |
|         | gene3148 | tmrB      | nucleoside antibiotic                                                   | 76.6%      |
|         | gene3179 | aadK      | aminoglycoside antibiotic                                               | 63.4%      |
|         | gene3270 | bcrA      | peptide antibiotic                                                      | 79.1%      |

|     |          |        |                                                                        |       |
|-----|----------|--------|------------------------------------------------------------------------|-------|
|     | gene3271 | bcrB   | peptide antibiotic                                                     | 55.6% |
|     | gene3272 | bcrC   | peptide antibiotic                                                     | 57.6% |
|     | gene3307 | mprF   | peptide antibiotic                                                     | 78.4% |
|     | gene3343 | Bla1   | penam                                                                  | 64.1% |
|     | gene3452 | tetA   | penam;tetracycline antibiotic                                          | 52.5% |
|     | gene3462 | ykkC   | aminoglycoside antibiotic;phenicol antibiotic;tetracycline antibiotic  | 81.5% |
|     | gene3463 | ykkD   | aminoglycoside antibiotic;phenicol antibiotic;tetracycline antibiotic  | 81.7% |
|     | gene3591 | rpoB2  | peptide antibiotic;rifamycin antibiotic                                | 64.3% |
|     | gene0184 | blt    | acridine dye;fluoroquinolone antibiotic                                | 77.6% |
|     | gene0228 | FosB   | fosfomycin                                                             | 62.8% |
|     | gene0299 | BcII   | cephalosporin;penam                                                    | 51.1% |
|     | gene0316 | Bla1   | penam                                                                  | 64.7% |
|     | gene0412 | tetA   | penam;tetracycline antibiotic                                          | 52.5% |
|     | gene0422 | ykkC   | aminoglycoside antibiotic;phenicol antibiotic;tetracycline antibiotic  | 80.4% |
|     | gene0423 | ykkD   | aminoglycoside antibiotic;phenicol antibiotic;tetracycline antibiotic  | 82.7% |
|     | gene1048 | tet(L) | tetracycline antibiotic                                                | 80.5% |
|     | gene1049 | SAT-4  | nucleoside antibiotic                                                  | 51.7% |
| BV5 | gene2380 | dfrG   | diaminopyrimidine antibiotic                                           | 52.5% |
|     | gene2885 | rphB   | rifamycin antibiotic                                                   | 78.9% |
|     | gene3016 | aadK   | aminoglycoside antibiotic                                              | 63%   |
|     | gene3092 | tmrB   | nucleoside antibiotic                                                  | 77.7% |
|     | gene3132 | lmrB   | lincosamide antibiotic                                                 | 88.4% |
|     | gene3146 | mphK   | macrolide antibiotic                                                   | 64.1% |
|     | gene3339 | mprF   | peptide antibiotic                                                     | 78.9% |
|     | gene3451 | vmIR   | lincosamide antibiotic; macrolide antibiotic; oxazolidinone antibiotic | 71%   |
|     | gene3555 | rpoB2  | peptide antibiotic; rifamycin antibiotic                               | 64.3% |
|     | gene3653 | ampC1  | cephalosporin;penam                                                    | 52.8% |

---

\*ARO means Antibiotic Resistance Ontology
