# Supplementary figures and images for: Screening of Bacteria Inhibiting Clostridium perfringens and Assessment of Their Beneficial Effects In Vitro and In Vivo with Whole Genome Sequencing Analysis
Source: MDPI journal article supplement (doi:10.3390/microorganisms10102056), 2022-10-18

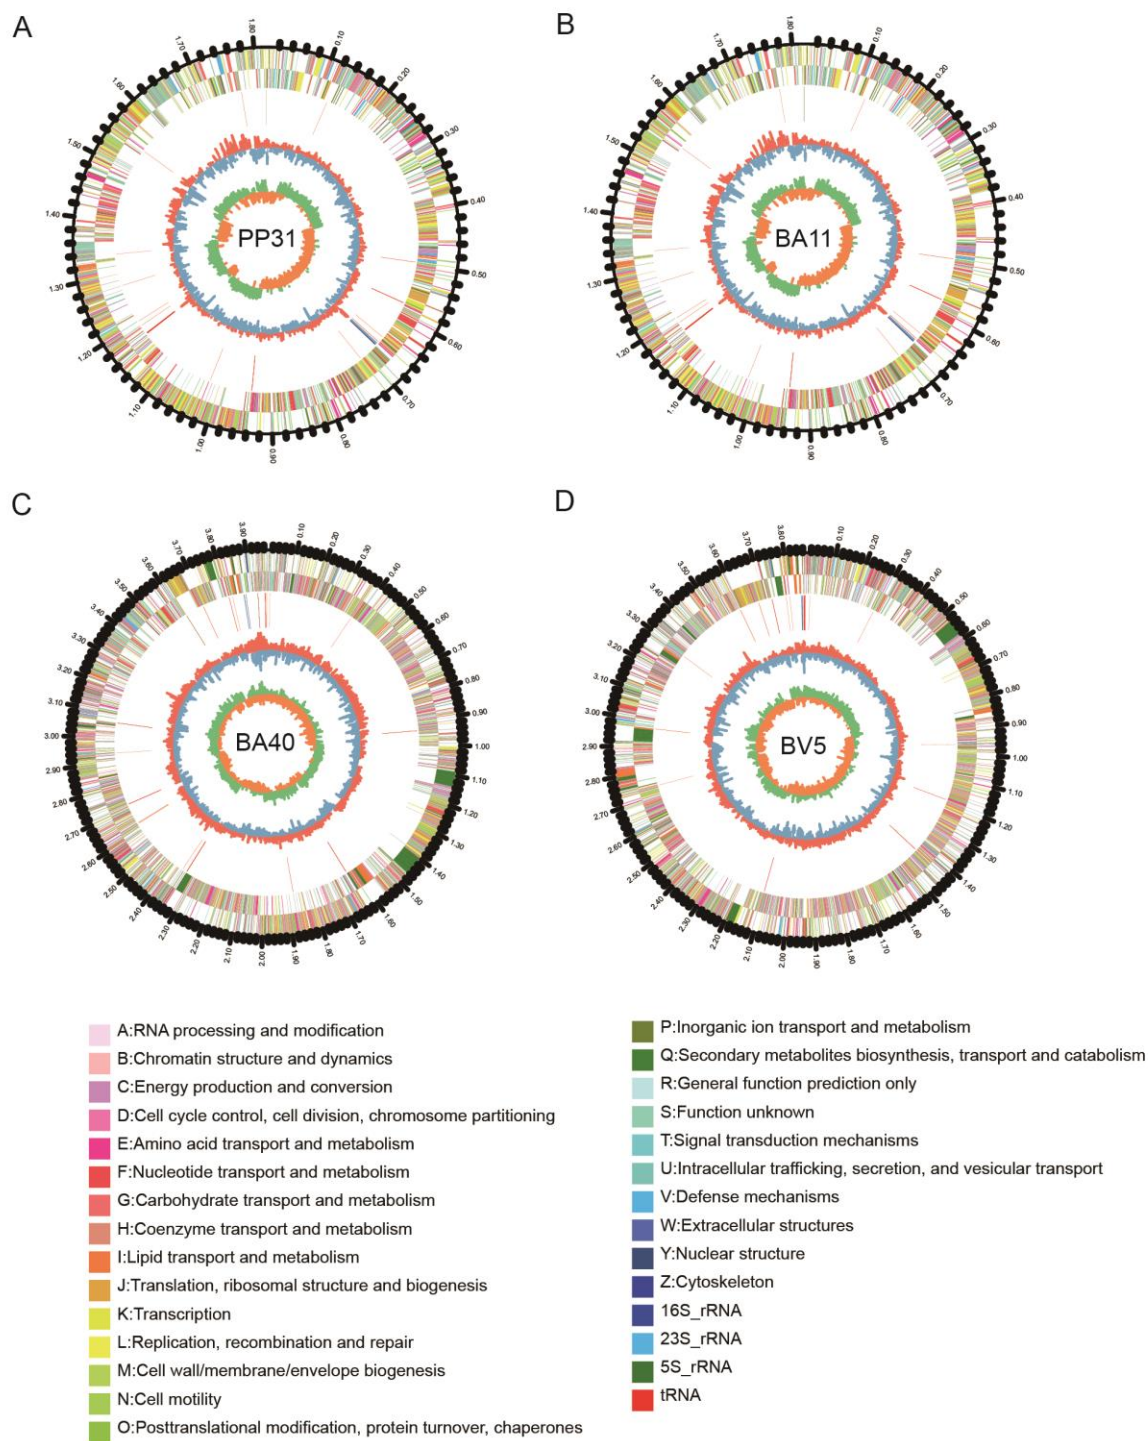

Figure S1: Circos genome circle map of probiotic candidate strains

Supplement: s1 [file s1]
